# Supplementary material for: Improving Phenolic Total Content and Monoterpene in Mentha x piperita by Using Salicylic Acid or Methyl Jasmonate Combined with Rhizobacteria Inoculation
Source: PubMed Central journal article supplement (PMC6981552; doi:10.3390/ijms21010050), 2019-12-19
Supplement: ijms-21-00050-s001.pdf [file ijms-21-00050-s001.pdf]

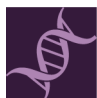

Supplementary

## Improving phenolic total content and monoterpene in *Mentha x piperita* by using salicylic acid or methyl jasmonate combined with rhizobacteria inoculation

Lorena del Rosario Cappellari <sup>1</sup>, Maricel Valeria Santoro <sup>2</sup>, Axel Schmidt <sup>2</sup>, Jonathan Gershenzon <sup>2</sup> and Erika Banchio <sup>1,\*</sup>

<sup>1</sup> INBIAS (CONICET-Universidad Nacional de Río Cuarto), Campus Universitario, 5800 Río Cuarto, Argentina

<sup>2</sup> Department of Biochemistry, Max Planck Institute for Chemical Ecology, Hans-Knöll-Str. 8, 07745 Jena, Germany

\* Correspondence: ebanchio@exa.unrc.edu.ar; Fax: 0054-358-4676232

**Supplementary Table S1.** Effects of inoculation with PGPR strains and of the external application of SA on TPC, PAL activity, pulegone and menthol content of *M. x piperita* plants. Values are mean  $\pm$  standard error (SE).

| Treatments | TPC<br>( $\mu\text{g/g fw}$ ) | PAL activity<br>( $\mu\text{g Trans-Cinnamic Acid/Min} \times \text{mg Protein}$ ) | Pulegone<br>( $\mu\text{g/g fw}$ ) | Menthol<br>( $\mu\text{g/g fw}$ ) |
|------------|-------------------------------|------------------------------------------------------------------------------------|------------------------------------|-----------------------------------|
| Control    | 209.84 $\pm$ 13.20            | 4.62 $\pm$ 0.30                                                                    | 3.74 $\pm$ 0.16                    | 0.20 $\pm$ 0.02                   |
| G          | 333.51 $\pm$ 32.84            | 13.84 $\pm$ 2.21                                                                   | 13.90 $\pm$ 0.71                   | 1.29 $\pm$ 0.10                   |
| S          | 329.62 $\pm$ 27.73            | 16.84 $\pm$ 2.38                                                                   | 10.75 $\pm$ 0.83                   | 1.22 $\pm$ 0.10                   |
| W          | 347.98 $\pm$ 22.38            | 11.30 $\pm$ 2.30                                                                   | 9.71 $\pm$ 0.42                    | 0.99 $\pm$ 0.28                   |
| Control SA | 254.03 $\pm$ 24.95            | 4.63 $\pm$ 0.30                                                                    | 4.27 $\pm$ 0.27                    | 0.19 $\pm$ 0.02                   |
| 1 mM SA    | 451.60 $\pm$ 29.96            | 51.79 $\pm$ 5.89                                                                   | 10.78 $\pm$ 1.44                   | 1.36 $\pm$ 0.13                   |
| 2 mM SA    | 443.06 $\pm$ 48.55            | 58.38 $\pm$ 3.92                                                                   | 8.12 $\pm$ 1.23                    | 1.48 $\pm$ 0.21                   |
| 1 mM G     | 458.13 $\pm$ 15.21            | 61.49 $\pm$ 10.61                                                                  | 11.11 $\pm$ 1.82                   | 1.63 $\pm$ 0.15                   |
| 1 mM S     | 419.43 $\pm$ 8.98             | 58.13 $\pm$ 9.22                                                                   | 12.05 $\pm$ 1.51                   | 1.40 $\pm$ 0.20                   |
| 1 mM W     | 446.32 $\pm$ 14.42            | 81.63 $\pm$ 13.16                                                                  | 10.90 $\pm$ 1.56                   | 1.54 $\pm$ 0.26                   |
| 2 mM G     | 672.22 $\pm$ 7.84             | 121.36 $\pm$ 15.99                                                                 | 6.56 $\pm$ 0.82                    | 1.81 $\pm$ 0.10                   |
| 2 mM S     | 461.65 $\pm$ 39.77            | 99.88 $\pm$ 10.54                                                                  | 8.63 $\pm$ 1.52                    | 1.70 $\pm$ 0.55                   |
| 2 mM W     | 397.95 $\pm$ 16.33            | 69.96 $\pm$ 26.38                                                                  | 9.36 $\pm$ 1.45                    | 1.75 $\pm$ 0.41                   |

**Supplementary Table S2.** Effects of inoculation with PGPR strains and of the external application of MeJA on TPC, PAL activity, pulegone and menthol content of *M. x piperita* plants. Values are mean  $\pm$  standard error (SE).

| Treatments   | TPC<br>( $\mu\text{g/g fw}$ ) | PAL activity<br>( $\mu\text{g trans-cinnamic acid min-1 mg-1 protein}$ ) | Pulegone<br>( $\mu\text{g/g fw}$ ) | Menthol<br>( $\mu\text{g/g fw}$ ) |
|--------------|-------------------------------|--------------------------------------------------------------------------|------------------------------------|-----------------------------------|
| Control MeJA | 192.43 $\pm$ 16.52            | 4.60 $\pm$ 0.28                                                          | 3.99 $\pm$ 0.28                    | 0.23 $\pm$ 0.07                   |
| 1mM          | 320.21 $\pm$ 13.05            | 90.54 $\pm$ 10.07                                                        | 10.53 $\pm$ 0.99                   | 0.75 $\pm$ 0.18                   |
| 2mM          | 440.41 $\pm$ 22.72            | 142.70 $\pm$ 25.97                                                       | 8.94 $\pm$ 1.11                    | 0.69 $\pm$ 0.15                   |
| 4mM          | 473.42 $\pm$ 53.64            | 280.98 $\pm$ 25.22                                                       | 16.61 $\pm$ 1.91                   | 1.56 $\pm$ 0.14                   |
| 1mM + G      | 321.30 $\pm$ 11.24            | 139.44 $\pm$ 14.54                                                       | 5.85 $\pm$ 0.40                    | 0.42 $\pm$ 0.06                   |
| 1mM + S      | 304.73 $\pm$ 12.06            | 134.93 $\pm$ 5.75                                                        | 9.67 $\pm$ 0.53                    | 0.47 $\pm$ 0.17                   |
| 1mM + W      | 316.45 $\pm$ 24.25            | 115.45 $\pm$ 22.93                                                       | 9.27 $\pm$ 0.89                    | 0.78 $\pm$ 0.11                   |
| 2mM + G      | 401.43 $\pm$ 18.72            | 192.39 $\pm$ 13.98                                                       | 22.55 $\pm$ 2.06                   | 1.76 $\pm$ 0.32                   |
| 2mM + S      | 379.10 $\pm$ 16.73            | 176.66 $\pm$ 37.48                                                       | 30.12 $\pm$ 1.32                   | 2.31 $\pm$ 0.37                   |
| 2mM + W      | 392.65 $\pm$ 49.40            | 165.60 $\pm$ 40.41                                                       | 35.89 $\pm$ 1.18                   | 2.36 $\pm$ 0.47                   |
| 4mM + G      | 613.11 $\pm$ 25.30            | 301.73 $\pm$ 61.09                                                       | 9.71 $\pm$ 0.82                    | 0.61 $\pm$ 0.13                   |
| 4mM + S      | 563.22 $\pm$ 17.49            | 282.95 $\pm$ 39.37                                                       | 8.06 $\pm$ 0.43                    | 0.58 $\pm$ 0.09                   |
| 4mM + W      | 481.25 $\pm$ 21.30            | 276.18 $\pm$ 25.45                                                       | 10.30 $\pm$ 0.88                   | 0.76 $\pm$ 0.02                   |
